# Supplementary material for: Giving insights into an ICF training: evaluation of an in-person interactive ICF training in Germany
Source: Frontiers journal article supplement (doi:10.3389/fresc.2024.1419969), 2024-07-16
Supplement: Data_Sheet_1.pdf [file Data_Sheet_1.pdf]

## **Variables used for the evaluation of the ICF training**

Format of response options is presented in brackets.

### **Part 1            Documentation of level of ICF knowledge**

- 1.1      Knowledge of the ICF (no knowledge, basic knowledge, I know the ICF model, I use the ICF in everyday life/at work, I can apply the ICF qualifiers including coding, I am familiar with the linking method)

### **Part 2            Assessment of the increase in ICF knowledge**

#### **(A) Biopsychosocial model**

- 2.1      Definition of disability (yes – no)
- 2.2      Components of the biopsychosocial model (multiple choice with 5 response options)
- 2.3      Aim of the ICD (yes – no)
- 2.4      Examples of ICF components (sorting task with 5 pairs)

#### **(B) Aim and use of the ICF**

- 3.1      Degree of functioning problems in persons with the same diagnoses (yes – no)
- 3.2      Use cases of the ICF (multiple choice with 5 response options)
- 3.3      ICF as a common language (cloze test)
- 3.4      The ICF and its use in the health care system (multiple choice with 5 response options)

#### **(C) Structure and codes of the ICF**

- 4.1      Hierarchical structure of the classification (yes – no)
- 4.2      Letters of the components (sorting task with 4 pairs)
- 4.3      Levels of ICF categories (multiple choice with 4 response options)
- 4.4      Hierarchy of the ICF categories (yes – no)

#### **(D) ICF qualifiers**

- 5.1      Letter-number combination of ICF categories (yes – no)
- 5.2      Number of component specific qualifiers for Body Functions and structures (yes – no)
- 5.3      Component specific qualifiers for Body Structures (sorting task with 3 pairs)
- 5.4      Qualifiers addressing capacity and performance (multiple choice with 5 response options)
- 5.5      Qualifiers addressing facilitators and barriers in Environmental Factors (multiple choice with 4 response options)

### **Part 3            Feedback on the content and organisation of the training / documentation of professional background data**

6

- 6.1 The training was well-organized (4-point Likert scale)
- 6.2 The lecture content was comprehensible (4-point Likert scale)
- 6.3 The presentations were appropriate (4-point Likert scale)
- 6.4 The exercises improved the practical application of the ICF (4-point Likert scale)
- 6.5 I found the group exercises appropriate (4-point Likert scale)
- 6.6 The relevance to my work was significant (4-point Likert scale)
- 6.7 The knowledge acquired met my expectations (4-point Likert scale)
- 6.8 I recommend this training to others (4-point Likert scale)
- 6.9 Comments, remarks or suggestions for improvement regarding the training (Open-ended question)
  
- 6.10 Health profession (physician; nurse; psychologist, social worker, therapist, others)
- 6.11 Field of activity (clinical work, social work, research, others)
- 6.12 Year of professional experience
